# Supplementary material
Source: Springer Nature journal article supplement (https://www.springermedizin.de/resource/supplementary/12936_2008_651_MOESM5_ESM.pdf/9547918)

Incremental costs: RDT all vs RDT for over 6 years of age: **base case age breakdown**

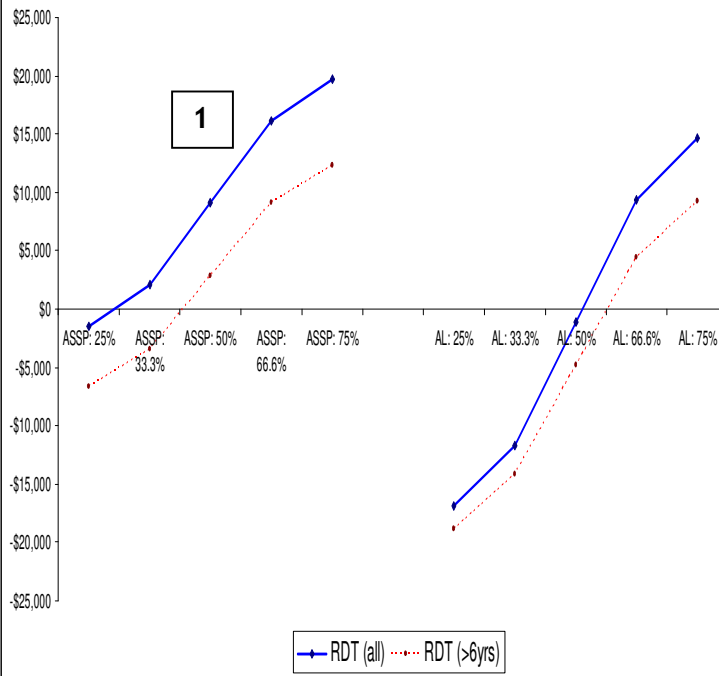

Incremental costs: RDT all vs RDT for over 6 years of age: **age breakdown 1**

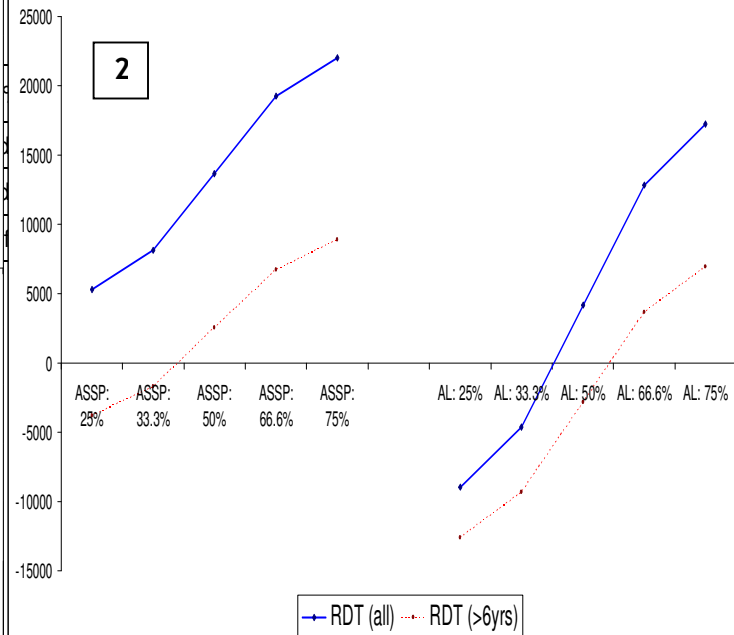

Incremental costs: RDT all vs RDT for over 6 years of age: **age breakdown 2**

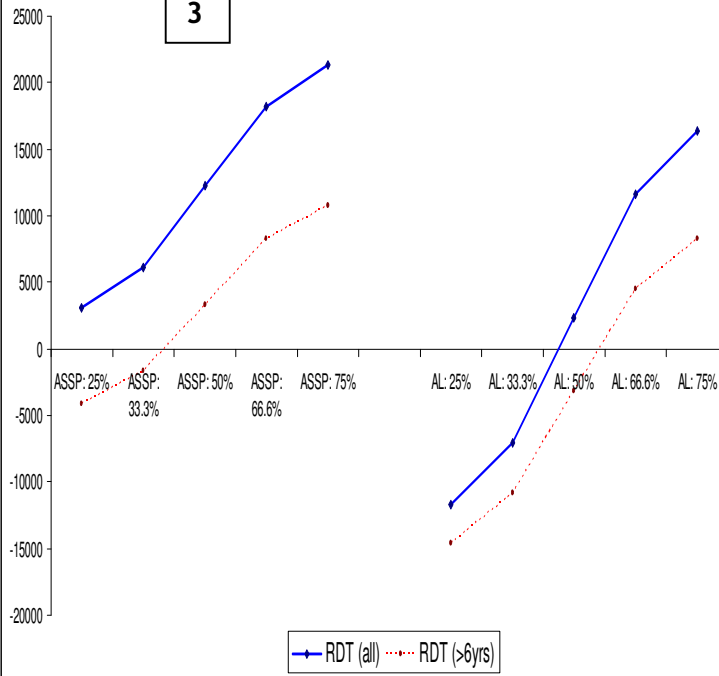

Incremental costs: RDT all vs RDT for over 6 years of age: **age breakdown 3**

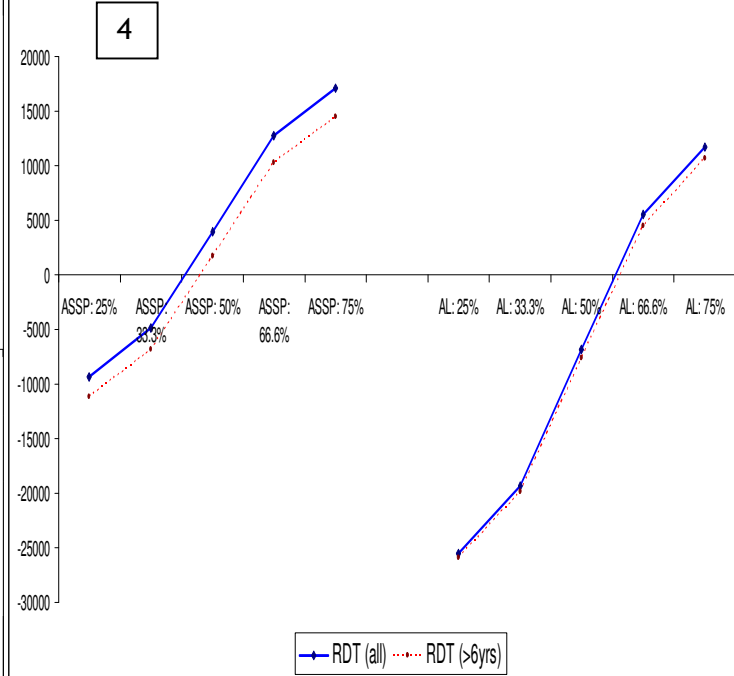

Supplement: MOESM5 [file 9547918]
